# Supplementary material for: Summary of Key Issues Raised in the Technology for Early Awareness of Addiction and Mental Illness (TEAAM-I) Meeting
Source: Atypon-hosted journal article supplement (doi:10.1176/appi.ps.201700270), 2018-01-16
Supplement: appi.ps.201700270.ds001.pdf [file appi.ps.201700270.ds001.pdf]

**Appendix**

|                                                      | <u>Page</u> |
|------------------------------------------------------|-------------|
| A. Organizing Committee                              | 2           |
| B. Sponsors                                          | 2           |
| C. Meeting Agenda                                    | 3           |
| D. Participant List and Affiliations                 | 4           |
| E. Lessons from MHA Screening                        | 9           |
| F. Summary of Key Areas Discussed During the Meeting | 10          |

**A: TEAAM-I Organizing Committee**

John Kane, Chair,  
The Zucker Hillside Hospital/Hofstra Northwell School of Medicine

Danielle Schlosser, Co-chair,  
Verily / University of California, San Francisco

Susan Azrin,  
National Institute of Mental Health

Mary Giliberti,  
National Alliance on Mental Illness

Robert Heinszen,  
National Institute of Mental Health

Thomas Insel,  
Verily Life Sciences

Linda Rosenberg,  
National Council for Behavioral Health

**B: TEAAM-I Sponsors**

Northwell Health

Verily Life Sciences

The Zucker Hillside Hospital

Donald and Barbara Zucker

The National Alliance on Mental Illness

The National Council for Behavioral Health

## C: TEAAM-I Meeting Agenda

**October 13th & 14th, 2016 in NYC**

**Thursday, October 13, 2016**

---

- 9:15 - 9:45 PM      **From Transactional to Integrated: New Directions Sought**  
Helen Christensen, Black Dog Institute and University New South Wales
- 9:45 - 10:15 PM    **Challenges and Opportunities of Digital Mental Health Services: The Australian MindSpot Clinic**  
Nick Titov, MindSpot/MacQuarie University

**Friday, October 14, 2016**

---

- 8:30 - 8:45 AM      **Welcome & Introductions**  
John Kane, Hofstra Northwell School of Medicine and The Zucker Hillside Hospital
- 8:45 - 9:00 AM      **The Promise of Technology**  
Danielle Schlosser, Verily
- 9:00 AM –  
12:00 PM            **Invited Talks**
- 1:15 - 2:45 PM      **Breakout Groups**
- Group I: Getting the Attention of the Target Audience (those with unidentified psychiatric and/or addictive disorders).**  
Co-chairs: Helen Christensen, Black Dog Institute and University New South Wales  
Theresa Nguyen, Mental Health America
- Group II: Proactive Identification of Psychiatric Symptoms (for those not identified before) Using Digital Data (e.g. social media postings/passive sensing/semantic analysis/search histories, etc.).**  
Munmun De Choudhury, Georgia Tech  
Justin T. Baker, McLean Hospital, Harvard Medical School
- Group III: What do we do After Identifying People to be in a Potentially “at need” Group?**  
David Mohr, Northwestern University  
Nick Titov, Mindspot/ MacQuarie University
- 3:15 - 4:45 PM      **Final Panel: Summary and Recommendations**  
John Kane, Hofstra Northwell School of Medicine and The Zucker Hillside Hospital  
Danielle Schlosser, Verily

4:45 - 5:00 PM

**Wrap Up and Next Steps**

John Kane, Hofstra Northwell School of Medicine and The Zucker Hillside Hospital

**D: TEAAM-I Participant List and Affiliations**

| <b>Name</b>       | <b>Job Title</b>                                                                                                                                                                | <b>Relevant Professional Interest</b>                                                                                                                                                                                                    |
|-------------------|---------------------------------------------------------------------------------------------------------------------------------------------------------------------------------|------------------------------------------------------------------------------------------------------------------------------------------------------------------------------------------------------------------------------------------|
| Steve Adelsheim   | Clinical Professor & Associate Chair for Community Engagement, Department of Psychiatry and Behavioral Sciences, Stanford University                                            | Developing and implementing early detection/intervention programs.                                                                                                                                                                       |
| Patricia Areán    | Professor in the Department of Psychiatry and Behavioral Sciences, University of Washington                                                                                     | Effectiveness of technology based behavioral interventions for mood disorders in adults.                                                                                                                                                 |
| Francisca Azocar  | Vice President of Research and Evaluation, Optum                                                                                                                                | The scientific merit of new programs and services using digital technology.                                                                                                                                                              |
| Susan Azrin       | Program Chief of the Primary Care Research Program, National Institute of Mental Health.                                                                                        | Reduction of premature mortality in individuals with severe mental illness and reduction of the duration of untreated psychosis.                                                                                                         |
| Justin Baker      | Assistant Professor of Psychiatry in the Department of Psychiatry, Harvard Medical School<br>Scientific Director of the Institute for Technology in Psychiatry, McLean Hospital | Digital phenotyping and computational assessment of dyadic interactions. Primarily focused on schizophrenia and bipolar disorder.                                                                                                        |
| Amit Baumel       | Assistant Professor, Northwell Hofstra School of Medicine<br>Co-Founder, FriendsOfMind                                                                                          | The use of technology to empower people within the community to support one another. Heuristic evaluation of e-Health intervention programs.                                                                                             |
| Anita Bechtholt   | Program Director in the Division of Treatment and Recovery Research, National Institute on Alcohol Abuse and Alcoholism                                                         | Technology, mHealth, and translational projects relating to the treatment of alcohol use disorder.                                                                                                                                       |
| Cyntrice Bellamy  | Director, Division of State and Community Systems Development within the Substance Abuse and Mental Health Services Administration.                                             | Ten Percent Set Aside, First Episode Psychosis program oversight.                                                                                                                                                                        |
| Dror Ben Zeev     | Associate Professor in the Departments of Psychiatry and Biomedical Data Science at Dartmouth Medical School<br>Director of the Mobile Health for Mental Health Program         | Development and evaluation of technology-based approaches in the study, assessment, and treatment of mental illness.                                                                                                                     |
| Michael Birnbaum  | Assistant Professor, Center for Psychiatric Neuroscience, The Feinstein Institute for Medical Research<br>Program Director for Northwell Health's Early Treatment Program (ETP) | Clinical and research initiative for adolescents and young adults in the early stages of psychosis.                                                                                                                                      |
| John Boyd         | CEO, Sutter Solano Medical Center & Sutter Center for Psychiatry<br>Commissioner, Mental Health Services Oversight & Accountability Commission                                  | Policy, advocacy, and working with the public and private sector to tackle healthcare challenges, including mental health. Implementing programs for prevention and early intervention, and housing for individuals with mental illness. |
| Guillermo Cecchi  | Research Staff Member, IBM Research                                                                                                                                             | The use of a computational linguistics approach to quantify psychiatric conditions from short speech samples.                                                                                                                            |
| Tanzeem Choudhury | Associate professor in Computing and Information Sciences, Cornell University<br>Co-founder of HealthRhythms                                                                    | Technology-assisted wellbeing.                                                                                                                                                                                                           |

|                     |                                                                                                                                                                                    |                                                                                                                                                                                    |
|---------------------|------------------------------------------------------------------------------------------------------------------------------------------------------------------------------------|------------------------------------------------------------------------------------------------------------------------------------------------------------------------------------|
| Helen Christensen   | Director & Chief Scientist, Black Dog Institute<br>Professor of Mental Health at the University of New South Wales                                                                 | Integration of websites, apps, sensors, social media and Smartphone tools into large scale prevention and intervention programs for anxiety, depression and suicide.               |
| Barbara Cornblatt   | Professor of Psychiatry, The Hofstra Northwell School of Medicine<br>Director of the Recognition and Prevention Program, The Zucker Hillside Hospital                              | Identification of predictors of psychosis in at-risk adolescents and development of early interventions to prevent illness from progressing.                                       |
| Christoph Correll   | Professor of Psychiatry, Hofstra Northwell School of Medicine<br>Medical director of the Recognition and Prevention program at the Zucker Hillside Hospital                        | Identification, characterization and management of adults and youths with the prodrome, first episode, multiepisode and refractory illness of severe psychotic and mood disorders. |
| Munmun De Choudhury | Assistant Professor at the School of Interactive Computing, Georgia Tech                                                                                                           | Computational social science, with a focus on reasoning about personal and societal well-being from social digital footprints.                                                     |
| Steven Dettwyler    | Public Health Analyst, SAMHSA                                                                                                                                                      | Data analysis of the Mental Health Block Grant.                                                                                                                                    |
| Michael Diefenbach  | Professor and Director of Behavioral Research in the Department of Medicine, Northwell Health<br>Director, Behavioral Research, Department of Medicine & Urology, Northwell Health | Cognitive and affective factors underlying health behavior.                                                                                                                        |
| Lisa Dixon          | Professor of Psychiatry, Columbia University Medical Center<br>Director of the Division of Behavioral Health and Services Research, Department of Psychiatry                       | Improving the quality of care, reducing the negative impact of co-occurring addictions and medical problems, and improving treatment engagement and adherence.                     |
| Daniel Eisenberg    | Professor, Department of Health Management & Policy, University of Michigan                                                                                                        | Effective investments in mental health of young people, particularly college age populations.                                                                                      |
| Nicole Ellison      | Professor, School of Information at the University of Michigan                                                                                                                     | Interpersonal communication processes in online contexts and the use and implications of social media to request information and for social support.                               |
| Deborah Estrin      | Professor of Computer Science, Cornell Tech                                                                                                                                        | Development of algorithms, systems and applications to support health and life management.                                                                                         |
| Bob Filbin          | Data Scientist at Crisis Text Line                                                                                                                                                 | Application of behavioral psychology to questions of data collection, analysis, and reporting.                                                                                     |
| Chantel Garrett     | Founding Director, Partners for StrongMinds                                                                                                                                        | Connecting individuals to early psychosis treatment through public education.                                                                                                      |
| Adam Gazzaley       | Professor in Neurology, Physiology and Psychiatry at the UCSF<br>Founder and Executive Director of Neuroscape                                                                      | Design and development of novel brain assessment and optimization tools to impact education, wellness, and medicine practices.                                                     |
| Paul Gilbert        | Chief Executive Officer and Co-Founder, MedAvante                                                                                                                                  | Technology-enabled signal detection solutions in treatments for central nervous system disorders.                                                                                  |
| Mary Giliberti      | Chief Executive Officer, National Alliance on Mental Illness (NAMI)                                                                                                                | Expanding access to First Episode Psychosis programs through information and advocacy for state and federal resources.                                                             |
| Jesse Gritton       | Education Specialist, Seattle-King County Public Health<br>Social Media and Adolescent Health<br>Research Team (SMAHRT), Seattle Children's Research Institute                     | Displays of harm to self or others, and marijuana advertising on social media.                                                                                                     |

|                      |                                                                                                                                                                        |                                                                                                                                                                                                  |
|----------------------|------------------------------------------------------------------------------------------------------------------------------------------------------------------------|--------------------------------------------------------------------------------------------------------------------------------------------------------------------------------------------------|
| Darcy Gruttadaro     | Director of Advocacy, National Alliance on Mental Illness (NAMI)                                                                                                       | Expanding access to First Episode Psychosis programs; Raising broader awareness about these programs and the importance of reducing the duration of untreated psychosis.                         |
| Anna Hasselblad      | Director of Public Policy, Steinberg Institute                                                                                                                         | Behavioral and mental health policy, program development, and strategic communications; ensuring affordable health coverage and access to care for underserved children and families.            |
| Hakon Heimer         | Founder/Editor, Schizophrenia Research Forum<br>Program Advisor for Cognitive Disorders, Cold Spring Harbor Laboratory<br>Co-Founder, Cure Alliance for Mental Illness | Central nervous system disorders                                                                                                                                                                 |
| Robert Heinssen      | Director of the Division of Services and Intervention Research, National Institute of Mental Health (NIMH).                                                            | Prodromal schizophrenia research, first episode psychosis, and neuroscience approaches for improving assessment and remediation of cognitive deficits in schizophrenia.                          |
| Thomas Insel         | Director of Clinical Neuroscience, Verily Life Sciences                                                                                                                | The use of digital tools to overcome the barriers to better outcomes in people with serious mental illness.                                                                                      |
| Nev Jones            | Director of Research, Felton Institute (San Francisco)                                                                                                                 | Racial disparities, engagement, and functional recovery from psychosis.                                                                                                                          |
| Emily Kagen          | Associate Vice President of Digital & Innovations Strategy, Northwell Health                                                                                           | Design and development of digital ecosystems to connect patients with physicians.                                                                                                                |
| John Kane            | Professor and Chairman of Psychiatry, The Hofstra Northwell School of Medicine.<br>Senior VP for Behavioral Health Services, The Northwell Health System               | The pharmacologic treatment of schizophrenia, with an emphasis on early identification and treatment as well as relapse prevention and the management of treatment refractory individuals.       |
| Nitya Kanuri         | Open Data Collaborations Manager, Crisis Text Line                                                                                                                     | Facilitation of bridges between academics, technologists, and community stakeholders to increase access to evidence-based mental healthcare.                                                     |
| Vikram Krishnamurthy | Professor at the Electrical & Computer Engineering, Cornell University                                                                                                 | Signal processing and control and their applications in sensors, social networks, natural language processing and biomedical applications.                                                       |
| Sanjiv Kumar         | Research Scientist, Google                                                                                                                                             | Big Data, Large Scale Machine Learning, Computer Vision, Graphical Models, Medical Imaging, Robotic                                                                                              |
| Rachel Loewy         | Clinical psychologist and Associate Professor of Psychiatry, UCSF                                                                                                      | Early psychosis- screening and early detection, computerized cognitive remediation, stress and trauma-related risk factors and implementation of evidence-based practices in community services. |
| Steven Lopez         | Professor of Psychology and Social Work ,USC                                                                                                                           | The study of psychopathology, assessment, and intervention among Latinos and other ethnic minority groups.                                                                                       |
| Husseini K. Manji    | Global Therapeutic Head for Neuroscience, Janssen Research & Development                                                                                               | Discovery and development of new therapeutics for major neurologic, psychiatric and pain-related diseases with a high unmet need for effective treatments.                                       |

|                           |                                                                                                                                                                                            |                                                                                                                                                                                                            |
|---------------------------|--------------------------------------------------------------------------------------------------------------------------------------------------------------------------------------------|------------------------------------------------------------------------------------------------------------------------------------------------------------------------------------------------------------|
| Mark Matthews             | Research Associate with the People Aware Computing Group, Cornell University<br>CTO, HealthRhythms                                                                                         | Biological rhythms (especially circadian rhythms) involved in mental health and productivity, and personalizing the measurement and treatment of mental wellbeing.                                         |
| Maggie Merritt            | Executive Director, Steinberg Institute                                                                                                                                                    | Advancing sound public policy and inspiring leadership on the issues of brain/mental health.                                                                                                               |
| David Mohr                | Professor, Preventive Medicine, Northwestern University<br>Director of The Center for Behavioral Intervention Technologies (CBITs)                                                         | The design, development and evaluation of digital health tools, and recommender systems for health apps.                                                                                                   |
| Don Mordecai              | Director of Mental Health and Addiction Medicine Services, The Permanente Medical Group (TPMG).<br>Adjunct Clinical Associate Professor of Psychiatry, Stanford University Medical School. | Developmental disorders and ADHD                                                                                                                                                                           |
| Jon Morgenstern           | Director of Addiction Services, NorthWell Health<br>Professor of Psychiatry, Hofstra Northwell School of Medicine, Hofstra University                                                      | Development of effective treatments for SUD and ensuring that such treatments are widely available in the healthcare system.                                                                               |
| Frederick Muench          | Director of Digital Health Interventions, Northwell Health<br>Adjunct Professor, NYU Interactive Telecommunications Program                                                                | Development and evaluation of interventions for physical and mental health problems with a special emphasis on addictive and appetitive behaviors using technology based mediums.                          |
| Keris Myrick              | Director of Consumer Affairs for the Center for Mental Health Services (CMHS) of the Substance Abuse and Mental Health Services Administration (SAMHSA)                                    | Consumer perspectives on treatment, services and supports, recovery oriented systems of care, and use of technology by people diagnosed with schizophrenia.                                                |
| Vaibhav Narayan           | Senior Director and Head, Integrative Solutions, Neuroscience Therapeutic Area, Johnson & Johnson                                                                                          | The utilization of advanced analytics and digital technologies to develop markers of early diagnosis, disease progression and relapse prediction in Alzheimer's Disease, Mood Disorders and Schizophrenia. |
| Camille Nebeker           | Assistant Professor of Behavioral Medicine, UC San Diego<br>Founder/Director of the Collaborative for Advancing Professional and Research Integrity (CAPRI).                               | Ethics education pedagogy and empirical research on the ethical, social and legal implications/dimensions of emerging technologies used in biomedical research.                                            |
| Theresa Nguyen            | Senior Director of Policy and Programs, Mental Health America                                                                                                                              | Using consumer services and technology to reduce untreated mental illness.                                                                                                                                 |
| Jeffrey Olivet            | Chief Executive Officer, Social Innovation (C4, Boston-based Center).                                                                                                                      | Harnessing innovative technologies to improve the lives of vulnerable and marginalized people.                                                                                                             |
| Timothy Peters-Strickland | Senior Director in Global Clinical Development, Otsuka Pharmaceuticals Development & Commercialization                                                                                     |                                                                                                                                                                                                            |
| Stephanie Pfister         | Director of Clinical Management, Otsuka Pharmaceutical Development & Commercialization (OPDC)                                                                                              | Clinical/operational management of CNS trials.                                                                                                                                                             |
| Barbara Ricci             | Director on NAMI Board of Directors<br>Co-board President of NAMI-NYC Metro                                                                                                                |                                                                                                                                                                                                            |
| Delbert Robinson          | Associate Investigator, Center for Psychiatric Neuroscience, The Zucker Hillside Hospital<br>Professor, Molecular Medicine & Psychiatry, Hofstra Northwell School of Medicine              | First episode (psychosis) treatment studies                                                                                                                                                                |

|                    |                                                                                                                               |                                                                                                                                                                                               |
|--------------------|-------------------------------------------------------------------------------------------------------------------------------|-----------------------------------------------------------------------------------------------------------------------------------------------------------------------------------------------|
| Linda Rosenberg    | President and CEO, National Council for Behavioral Health                                                                     | Health literacy, access to effective mental health and addictions care, leveraging technology solutions that have the potential to radically change the way people are diagnosed and treated. |
| Jose Rubio-Lorente | Psychiatry Chief Resident for Research, The Zucker Hillside Hospital,                                                         | Improving access to evidence based treatment for the public struggling with mental illness.                                                                                                   |
| Danielle Schlosser | Research Scientist, Verily Life Sciences<br>Assistant Professor of Psychiatry at UCSF                                         | Development and testing of neuroscience-informed digital therapeutics for young people with psychosis.                                                                                        |
| Lloyd Sederer      | Chief Medical Officer, NYS Office of Mental Health<br>Adjunct Professor, Columbia/Mailman School of Public Health             | Improve the understanding of mental illnesses, addictions, their prevention and treatment                                                                                                     |
| Vinod Srihari      | Associate Professor, Yale School of Medicine<br>Founder of the Program for Specialized Treatment Early in Psychosis (STEP)    | Development of a model of care (in community settings) to promote the functional recovery of individuals with psychotic illnesses.                                                            |
| Brandon Staglin    | Director of Marketing Communications, Staglin Family Vineyard and IMHRO                                                       | Improvement of recovery prospects for people with mental illness and preventing illness in those at risk.                                                                                     |
| Nick Titov         | Associate Professor, Psychology, Macquarie University<br>Project Director, MindSpot Clinic<br>Co-Director, eCentreClinic      | Development and evaluation of strategies for reducing barriers to treatments for people with high prevalence psychological disorders.                                                         |
| John Torous        | Clinical Informatics Fellow, Division of Clinical Informatics at Beth Israel Deaconess Medical Center, Harvard Medical School | The delivery and advancement of high caliber patient care through healthcare technology and medical education, and improving understanding of patient-physician relationship.                 |
| Collin Walter      | Mental Health Platform Manager, Verily                                                                                        |                                                                                                                                                                                               |
| Kristina West      | Policy Analyst at the Office of the Assistance Secretary for Planning and Evaluation, HHS.                                    | Child and adolescent behavioral health prevention, and early intervention for first episode psychosis.                                                                                        |
| Janis Whitlock     | Research Scientist at Bronfenbrenner Center for Translation Research, Cornell University                                      | Non-suicidal self-injury, the role of technology in sexual health and violence and the relationship between social media and mental health                                                    |

**E: Abstract of *Lessons from MHA Screening Talk***  
**Theresa Nguyen, Mental Health America**

Increasingly, individuals are turning to the internet to find mental health information and support. In 2014, Mental Health America (MHA) provided individuals with free, anonymous, and confidential mental health screens including: depression, anxiety, bipolar, PTSD, substance and alcohol use, youth, parent, and psychosis screen. To date, we provide over 2,800 screens daily and over 1.6 million screens since we started. Our data offers an opportunity to understand what is happening for young people who are experiencing mental health problems, who are not yet connected to treatment, and what they want for follow up and support. From screens we know that: 1) Most screeners are ages 11-34, 2) Most screeners score “positive” (moderate to severe range of symptoms for each screen), 3) Most of those who screen positive report that they have never been diagnosed with a mental health condition. To create user-guided solutions to address these concerns, we asked individuals to tell us how MHA could help them post-screening. The top three responses were (~45-50%): Provide additional information about mental health; Offer an online or mobile program or app that can help you track or manage your symptoms; Provide worksheets or coping skills to use at home.



## F: Summary of Key Areas Discussed During the Meeting

| Technology's Promise                                                                           | Challenges                                                                                                                                                                                                                                                                                                                                                                                      | Key Areas for Future Research                                                                                                                                                                                                                                                                                                                                                                                                                                                                                                                                                                                                                                                                                                         |
|------------------------------------------------------------------------------------------------|-------------------------------------------------------------------------------------------------------------------------------------------------------------------------------------------------------------------------------------------------------------------------------------------------------------------------------------------------------------------------------------------------|---------------------------------------------------------------------------------------------------------------------------------------------------------------------------------------------------------------------------------------------------------------------------------------------------------------------------------------------------------------------------------------------------------------------------------------------------------------------------------------------------------------------------------------------------------------------------------------------------------------------------------------------------------------------------------------------------------------------------------------|
| <b>Public Awareness - Getting the Attention of the Target Audience Online</b>                  |                                                                                                                                                                                                                                                                                                                                                                                                 |                                                                                                                                                                                                                                                                                                                                                                                                                                                                                                                                                                                                                                                                                                                                       |
| Access to information                                                                          | The reasons and context of informational website utilization within pathways to care are unclear. Online screening initiatives have yet to show efficacy in facilitating early engagement with therapeutic activities of any sort.                                                                                                                                                              | User centered research: Investigating (both on- and off-line) the context in which users are utilizing websites.<br>Rigorously examine the difference (with/without online screening) in engagement with traditional and non-traditional care. Focus should be on clear understanding of users' attributes (demographics/diagnosis; not derived only from self reports).                                                                                                                                                                                                                                                                                                                                                              |
| <b>Meeting the Needs of People Who Have Not Sought Support in a Clinical Setting</b>           |                                                                                                                                                                                                                                                                                                                                                                                                 |                                                                                                                                                                                                                                                                                                                                                                                                                                                                                                                                                                                                                                                                                                                                       |
| Early / preventive interventions                                                               | It is not certain whether mental illnesses are defined in a way that also can enable the understanding and addressing of people's needs at an earlier stage.<br><br>People identify their needs based on functional concerns and not emerging symptoms.                                                                                                                                         | Establishing models that support the understanding of people's current state and needs. Examining models' applicability in guiding how to engage people appropriately.<br><br>Developing evidence-based solutions that are inclusive of functional recovery as a goal.                                                                                                                                                                                                                                                                                                                                                                                                                                                                |
| <b>Proactive Identification of Mental States in Need of Treatment Using Digital Signatures</b> |                                                                                                                                                                                                                                                                                                                                                                                                 |                                                                                                                                                                                                                                                                                                                                                                                                                                                                                                                                                                                                                                                                                                                                       |
| Early identification of psychiatric symptoms (before people first engaged with service)        | People are not used to actively enrolling into monitoring initiatives for the purpose of mental-health-self-care.<br><br>It is difficult to inform reliable mental state/illness solely from raw data (without self-reports).<br><br>It difficult to identify relapse patterns for the first time since there is no possible comparison with a previous event that could serve as an indicator. | Investigating the feasibility of "healthy" individuals opting in as part of regular care.<br><br>Investigating the combination of different digital footprints and signatures as a method to reduce uncertainty. Testing models that define the exact nature and extent of self-reported information that is necessary for identification.<br><br>Initiating a collaborative project to gather large amounts of user data (e.g., search terms, sensors, social media posts) combined with future/concurrent diagnosis (hospitalization, treatment, subjective needs). This may allow researchers to characterize human behavior objectively with respect to major sources of variance and identify common/typical patterns of change. |
